# Supplementary material for: PLZF, a Tumor Suppressor Genetically Lost in Metastatic Castration-Resistant Prostate Cancer, Is a Mediator of Resistance to Androgen Deprivation Therapy
Source: Oxford University Press journal article supplement (doi:10.1158/0008-5472.can-14-3602), 2015-03-26
Supplement: 00085472can143602-sup-142165_1_supp_2829444_nxhpx7.xls [file 00085472can143602-sup-142165_1_supp_2829444_nxhpx7.xls]

## Sheet: PLZFshRNA1or2_fc1.5_P.05_exp_Al
Symbol	probeset_id	PLZF shRNA#1_avg - ctrl_shRNA_avg	PLZF shRNA#2_avg - ctrl_shRNA_avg	(PLZF shRNA#1 vs. Ctrl)_P-value	(PLZF shRNA#2 vs. Ctr)_P-value
ZNF596	NM_173539	-1.59	-1.11	0.0048135	0.00472135
ADRA2A	NM_000681	-1.56	-1.53	0.0437759	0.0512004
BRDT	NM_001726	-1.45	-0.72	0.0560579	0.000217952
PCF11	NM_015885	-1.42	-0.36	0.027321	0.0561834
LUM	NM_002345	-1.35	-0.36	0.00754517	0.0757967
SFPQ	NM_005066	-1.32	-0.53	0.00507614	0.00641092
DSC2	NM_004949	-1.23	-0.81	0.00283992	0.0138012
SAMD13	NM_001010971	-1.22	-0.29	0.0301626	0.00732092
DNASE2B	NM_021233	-1.21	-0.39	0.0387185	0.017844
C1orf116	NM_023938	-1.14	-0.45	0.000606248	0.0307023
NTNG1	NM_014917	-1.13	-0.28	0.00371029	0.0596547
ZNF287	NM_020653	-1.13	-0.06	0.00210078	0.274592
ZNF789	NM_213603	-1.11	-0.42	0.0334572	0.0789641
BMPR1B	NM_001203	-1.09	-0.35	0.00810132	0.227952
ARPM1	NM_032487	-1.08	-0.19	0.00312097	0.159504
CPSF6	NM_007007	-1.07	-0.36	0.000260288	0.0012205
SYT4	NM_020783	-1.07	-1.16	0.018704	0.0056706
CBLN2	NM_182511	-1.03	0.11	0.00396783	0.0498136
PLGLB2	NM_002665	-1.03	-0.33	0.0231813	0.0793928
ZNF518B	NM_053042	-1.03	-0.37	0.0200438	0.104443
FAM53A	NM_001013622	-1.01	-0.23	0.0473768	0.18268
FASTKD5	NM_021826	-1	-0.3	0.00696011	0.00753995
PIGW	NM_178517	-1	-0.58	0.0329523	0.0568801
PIK3R1	NM_181504	-0.99	-0.38	0.000267439	0.00591663
SEC22C	NM_032970	-0.98	-0.04	0.0184643	0.407277
FZD3	NM_017412	-0.96	-0.21	0.0160915	0.00385033
PPP1R10	NM_002714	-0.95	-0.14	0.000608636	0.0326477
GUCY1A3	NM_000856	-0.94	-0.25	0.000278388	0.0021998
ZNF239	NM_005674	-0.94	-0.35	0.0363927	0.0669135
BICD1	NM_001003398	-0.93	-0.42	0.0155705	0.0835225
PHOSPHO2	NM_001008489	-0.93	-0.3	0.0150647	0.0808705
SLC38A2	NM_018976	-0.93	-0.17	0.0274264	0.142525
GTF2H1	NM_005316	-0.92	-0.22	0.00280725	0.0129999
ADAMTS3	NM_014243	-0.91	-0.16	0.00527299	0.149882
DSEL	NM_032160	-0.91	-0.65	0.00344488	0.00178869
SETMAR	NM_006515	-0.9	-0.42	0.0214147	0.0899523
C7orf36	NM_020192	-0.89	-0.24	0.00415373	0.0400823
FAM198B	NM_016613	-0.89	0.1	0.0212541	0.270508
LRRN1	NM_020873	-0.89	-0.48	0.00203453	0.0237397
METTL1	NM_023033,NM_005371	-0.89	-0.085	0.0100826	0.200338
RRP15	NM_016052	-0.89	-0.34	0.0146534	0.0348065
PHLDA1	NM_007350	-0.88	-0.33	0.00458285	0.0391088
SRSF3	NM_003017	-0.88	-0.37	8.51e-05	0.00165166
RAD51L1	NM_002877	-0.87	-0.06	0.0196787	0.269152
PTGFR	NM_000959	-0.86	-0.8	0.00143017	0.00894365
ST6GALNAC5	NM_030965	-0.85	0.28	0.0477218	0.187226
ZNF37A	NM_001007094	-0.85	-0.36	0.00388132	0.0178046
C1orf59	NM_144584	-0.84	-0.33	0.0184868	0.0133288
PEG3	NM_006210	-0.84	-0.62	0.0312218	0.0237936
PRMT6	NM_018137	-0.84	-0.36	0.0120208	0.0746492
SACS	NM_014363	-0.84	-0.36	0.0317082	0.00625658
ZNF605	NM_183238	-0.84	-0.04	0.00388336	0.289965
CHAC2	NM_001008708	-0.83	-0.37	0.00865115	0.0524997
PFAS	NM_012393	-0.83	-0.31	0.022138	0.0123515
PGBD2	NM_001017434	-0.83	-0.3	0.0402015	0.0557678
FAIM	NM_018147	-0.82	-0.58	0.00578098	0.00985502
HNRNPM	NM_005968	-0.82	-0.34	0.00151208	0.005454
HEATR3	NM_182922	-0.81	-0.39	0.0177958	0.0252902
JAGN1	NM_032492	-0.81	-0.25	0.000626456	0.00910477
N6AMT2	NM_174928	-0.81	-0.1	0.0457292	0.280549
TTC18	NM_145170	-0.81	-0.19	0.00681816	0.0821918
C14orf104	NM_018139	-0.8	-0.4	0.00988249	0.0563056
ZNF323	NM_145909	-0.8	-0.18	0.0276873	0.0812652
ADAMTS1	NM_006988	-0.79	-0.79	0.024609	0.0221713
PUS7	NM_019042	-0.78	-0.08	0.000608257	0.203398
GPR19	NM_006143	-0.77	-0.19	0.00688797	0.0588646
NUP35	NM_138285	-0.77	-0.11	0.0289014	0.227901
PDSS1	NM_014317	-0.77	-0.19	0.0205901	0.0905892
SLC4A4	NM_003759	-0.77	-0.56	0.007466	0.0144728
ST7	NM_018412	-0.77	0.08	0.0160084	0.260114
TSEN2	NM_025265	-0.77	-0.22	0.00381539	0.0394955
ZNF480	NM_144684	-0.77	-0.28	0.0388263	0.112865
C1orf163	NM_023077	-0.76	-0.21	0.00845122	0.0234552
SRSF2	NM_003016	-0.76	-0.32	0.00208772	0.0029345
TUBGCP3	NM_006322	-0.76	-0.4	0.0102588	0.0110597
ARHGEF26	NM_015595	-0.75	-0.87	0.0130197	0.00817834
EFNB2	NM_004093	-0.75	-0.12	0.0326378	0.0838264
HECTD2	NM_182765	-0.75	-0.46	0.00132799	0.0486532
MAFB	NM_005461	-0.75	-0.27	0.00223589	0.0245733
RPGRIP1L	NM_015272	-0.75	-0.37	0.00513757	0.0430493
SLC35B3	NM_015948	-0.75	-0.3	0.00720853	0.0457118
ZNF780A	NM_001010880	-0.75	-0.35	0.0461124	0.0231727
CCDC41	NM_016122	-0.74	-0.39	0.00697298	0.059525
FUS	NM_004960	-0.74	-0.29	0.00339502	0.0296575
IFNAR1	NM_000629	-0.74	-0.19	0.0294992	0.0207356
NOP56	NM_006392	-0.74	-0.3	0.00649426	0.0519907
PPHLN1	NM_016488	-0.74	-0.23	0.0294325	0.0746673
SCLT1	NM_144643	-0.74	-0.16	0.0451907	0.102575
ST7L	NM_138729	-0.74	-0.29	0.00395549	0.0409305
ARMC8	NM_015396	-0.73	-0.19	0.0143773	0.034747
FAM135A	NM_020819	-0.73	-0.48	0.00614751	0.0143513
SHC4	NM_203349	-0.73	-0.07	0.0460914	0.387071
SLC16A10	NM_018593	-0.73	-0.02	0.0111129	0.437019
WTAP	NM_152857	-0.73	-0.64	0.0130292	0.00660376
FGFBP3	NM_152429	-0.72	-0.34	0.012072	0.0440277
MANEA	NM_024641	-0.72	-0.17	0.00885611	0.0127084
TIMM8A	NM_004085	-0.72	-0.53	0.0275941	0.052609
MYRIP	NM_015460	-0.71	-0.16	0.00655406	0.0145448
NMNAT1	NM_022787	-0.71	-0.26	0.0170709	0.0437661
STAMBPL1	NM_020799	-0.71	-0.18	0.00353202	0.192192
ATP6V1E2	NM_080653	-0.7	-0.18	0.0213882	0.176105
BAG2	NM_004282	-0.7	-0.34	0.00452954	0.0171858
C14orf142	NM_032490	-0.7	-0.35	0.0321697	0.0433259
C3orf62	NM_198562	-0.7	-0.27	0.031815	0.085925
MYC	NM_002467	-0.7	-0.05	0.0140357	0.0750649
ZNF786	NM_152411	-0.7	-0.26	0.0224526	0.0506599
CXCR7	NM_020311	-0.69	-0.02	0.0116561	0.267898
FRMD3	NM_174938	-0.69	-0.29	0.0259924	0.0517089
KIAA0586	NM_014749	-0.69	-0.2	0.0174006	0.114596
MAT2A	NM_005911	-0.69	-0.1	0.0343721	0.206519
MPP6	NM_016447	-0.69	-0.42	0.0030899	0.0173164
NETO1	NM_138966	-0.69	-0.17	0.00147478	0.0394361
TNFRSF19	NM_148957	-0.69	-0.29	0.00717317	0.0348001
ZNF320	NM_207333	-0.69	-0.45	0.0343589	0.095158
BCCIP	NM_078469	-0.68	-0.33	0.0193589	0.0260619
C1orf107	NM_014388	-0.68	-0.26	0.00463348	0.0118395
GPRASP2	NM_001004051	-0.68	-0.28	0.0218361	0.00244722
IQCG	NM_032263	-0.68	-0.13	0.0381094	0.264915
MOCS3	NM_014484	-0.68	-0.11	0.0292945	0.28975
MPHOSPH8	NM_017520	-0.68	-0.15	0.0128102	0.00188834
NEIL3	NM_018248	-0.68	-0.36	0.0336789	0.0865659
B4GALT6	NM_004775	-0.67	-0.29	0.00498131	0.0501736
CAB39L	NM_030925	-0.67	-0.23	0.0167528	0.0541854
CCNE2	NM_057749	-0.67	-0.23	0.010164	0.124483
EPHX4	NM_173567	-0.67	0.06	0.0340155	0.332524
GATM	NM_001482	-0.67	-0.19	0.0034188	0.142421
HDX	NM_144657	-0.67	-0.21	0.00692649	0.231676
RAPGEF4	NM_007023	-0.67	-0.09	0.0128176	0.391067
SMPDL3A	NM_006714	-0.67	-0.48	0.00170254	0.00200643
THNSL1	NM_024838	-0.67	-0.28	0.00799492	0.0407113
TIGD7	NM_033208	-0.67	-0.3	0.0120843	0.0268696
UTP14A	NM_006649	-0.67	-0.21	0.00233011	0.0377569
ZNF124	NM_003431	-0.67	-0.36	0.0179965	0.0183401
DDX28	NM_018380	-0.66	-0.17	0.00203716	0.10866
DDX5	NM_004396	-0.66	-0.27	0.0200243	0.0329496
G3BP1	NM_005754	-0.66	-0.27	0.00631268	0.0422902
POLR3B	NM_018082	-0.66	-0.3	0.0413699	0.065576
PRRT3	NM_207351	-0.66	-0.27	0.0208989	0.0728445
SAA2	NM_030754	-0.66	-0.28	0.0380686	0.237874
SUV39H2	NM_024670	-0.66	-0.33	0.0237566	0.00994087
TXNIP	NM_006472	-0.66	-0.01	0.00570197	0.244514
CDC42EP3	NM_006449	-0.65	-0.29	0.000906038	0.00960783
KBTBD8	NM_032505	-0.65	0.04	0.0186709	0.33615
PIGM	NM_145167	-0.65	-0.2	0.0442162	0.0211082
C10orf2	NM_021830	-0.64	-0.02	0.0127706	0.397753
C2orf7	NM_032319	-0.64	0.07	0.00511857	0.178811
LCMT2	NM_014793	-0.64	-0.23	0.0231692	0.0840124
MBLAC2	NM_203406	-0.64	-0.31	0.0235262	0.0675184
MLYCD	NM_012213	-0.64	-0.16	0.0278699	0.11219
DCAF6	NM_001017977	-0.63	-0.26	0.0107652	0.00856733
DOCK10	NM_014689	-0.63	0.34	0.0412371	0.00676057
NUFIP1	NM_012345	-0.63	-0.08	0.0472247	0.291638
ZBED1	NM_004729	-0.63	-0.06	0.000140544	0.184275
ZNF302	NM_001012320	-0.63	-0.39	0.0339721	0.0386683
C14orf126	NM_080664	-0.62	-0.52	0.023655	0.034909
C14orf145	NM_152446	-0.62	-0.18	0.0207971	0.0979825
HYLS1	NM_145014	-0.62	-0.41	0.00882706	0.0198972
ISCA1	NM_030940	-0.62	-0.12	0.0211347	0.201402
NETO2	NM_018092	-0.62	-0.18	0.00904498	0.0140118
PARP9	NM_031458	-0.62	-0.5	0.0301702	0.0559272
RIN2	NM_018993	-0.62	-0.06	0.0224966	0.132711
RNF125	NM_017831	-0.62	-0.54	0.0224532	0.0142694
BMPR2	NM_001204	-0.61	-0.18	0.018983	0.0335495
DSG2	NM_001943	-0.61	-0.45	0.0189117	0.0185939
GULP1	NM_016315	-0.61	-0.24	0.0148364	0.0805878
MOSC1	NM_022746	-0.61	-0.11	0.0124079	0.0514716
NAT1	NM_000662	-0.61	-0.36	0.0107846	0.0215118
PRKACB	NM_002731	-0.61	-0.29	0.00557007	0.0236804
RTKN2	NM_145307	-0.61	-0.27	0.0092177	0.206453
STAG1	NM_005862	-0.61	-0.21	0.0285576	0.0501544
ZNF485	NM_145312	-0.61	-0.3	0.00832585	0.0194076
C1GALT1C1	NM_001011551	-0.6	-0.23	0.0254267	0.000448297
CEP192	NM_032142	-0.6	-0.26	0.000190308	0.00740183
CNKSR3	NM_173515	-0.6	-0.25	0.0276549	0.0531645
PPAP2A	NM_003711	-0.6	-0.24	0.00680329	0.0448559
TFRC	NM_003234	-0.6	-0.25	0.0205829	0.00236293
TRPS1	NM_014112	-0.6	0.1	0.00241042	0.035929
FAM200A	NM_145111	-0.59	-0.45	0.0412261	0.162256
FOXG1	NM_005249	-0.59	-0.54	0.0127362	0.0146709
HLF	NM_002126	-0.59	-0.04	0.00351047	0.205796
KCNN2	NM_021614	-0.59	-0.69	0.0117695	0.00325643
MIPEP	NM_005932	-0.59	-0.23	0.0126526	0.00812682
NME5	NM_003551	-0.59	-0.12	0.0115039	0.140777
NRP1	NM_003873	-0.59	-0.11	0.0287096	0.0131853
RIMS1	NM_014989	-0.59	0.04	0.024441	0.371589
RNF32	NM_030936	-0.59	0.04	0.00360521	0.409254
RWDD2A	NM_033411	-0.59	-0.31	0.0355159	0.0488162
SLC40A1	NM_014585	-0.59	-0.15	0.00255697	0.0638088
TRAK2	NM_015049	-0.59	-0.15	0.00115559	0.0908876
GABRB3	NM_000814	-0.58	-0.2	0.00631172	0.0654692
GPATCH4	NM_015590	-0.58	-0.26	0.0106904	0.00129132
MCPH1	NM_024596	-0.58	0.14	0.0476539	0.236843
NUP98	NM_005387	-0.58	-0.49	0.0217272	0.0211583
POGLUT1	NM_152305	-0.58	-0.25	0.010186	0.0535039
ZNF84	NM_003428	-0.58	-0.32	0.00222627	0.0113794
JAG1	NM_000214	-0.48	-0.68	0.021239	0.00785121
LYRM7	NM_181705	-0.48	-0.66	0.0490646	0.0376176
SPC25	NM_020675	-0.46	-0.58	0.0330497	0.00737608
RLN2	NM_005059	-0.41	-0.67	0.0588377	0.018714
TTK	NM_003318	-0.34	-0.59	0.0751965	0.03217
PCDH7	NM_002589	-0.29	0.71	0.0834322	0.0415832
UGT2B28	NM_053039	-0.27	0.71	0.0882431	0.0236138
TNNC2	NM_003279	0	0.58	0.482217	0.00865387
NPTX2	NM_002523	0.15	0.58	0.176533	0.025784
COL6A2	NM_001849	0.22	0.61	0.152779	0.0339432
SHISA2	NM_001007538	0.43	0.67	0.0478588	0.00946354
ZNF423	NM_015069	0.44	0.61	0.132297	0.0169546
CYP26A1	NM_000783	0.46	0.66	0.0865769	0.0350874
SH3BGRL3	NM_031286	0.46	0.6	0.0214253	0.0359029
C20orf160	NM_080625	0.48	0.74	0.139645	0.0156346
PKM2	NM_002654	0.5	0.63	0.0259039	0.00101141
AKR1C1	NM_001353	0.51	0.73	0.102105	0.0252515
TCEAL2	NM_080390	0.55	0.6	0.0392107	0.0107377
FERMT2	NM_006832	0.58	0.01	0.00678043	0.152105
NEDD9	NM_006403	0.58	0.36	0.00445897	0.0519849
WDR33	NM_001006622	0.58	0.12	0.00034497	0.0791124
ZFP36	NM_003407	0.58	-0.01	0.0131059	0.461709
EDN2	NM_001956	0.59	0.27	0.0396264	0.0666326
HTRA1	NM_002775	0.59	0.31	0.0331878	0.0590212
PPP4R4	NM_058237	0.59	0.28	0.0333598	0.104905
RNF19B	NM_153341	0.59	0.22	0.00665772	0.00397639
RRM2B	NM_015713	0.59	-0.27	0.0253784	0.0543778
TBRG1	NM_032811	0.59	0.08	0.0119323	0.0534072
TMEM8B	NM_016446	0.59	0.23	0.00495459	0.0256595
HBZ	NM_005332	0.6	0.63	0.0323802	0.0234563
PDZK1IP1	NM_005764	0.6	0.5	0.000416184	0.0500192
SPINT1	NM_003710	0.6	0.45	0.0031184	0.0239949
TAF5	NM_006951	0.6	-0.14	0.00628939	0.0407391
TEKT4	NM_144705	0.6	0.47	0.00451917	0.000345582
AKR1C2	NM_001354	0.61	0.66	0.0334878	0.00900299
EPB41L5	NM_020909	0.61	0.36	0.022161	0.070264
FOXD1	NM_004472	0.61	0.26	0.0285896	0.0700023
LCN2	NM_005564	0.61	0.17	0.0066196	0.0441671
PPM1J	NM_005167	0.61	0.37	0.00110284	0.0100878
ARL4C	NM_005737	0.62	0.27	0.0025496	0.0323906
CAMK1D	NM_020397	0.62	0.24	0.013666	0.152928
FRK	NM_002031	0.62	0.07	0.0235397	0.313588
IFRD1	NM_001007245	0.62	0.02	0.00176566	0.300974
KCNRG	NM_173605	0.62	0.15	0.0289371	0.0432631
NEBL	NM_213569	0.62	0.33	0.0237911	0.123517
PIM3	NM_001001852	0.62	0.27	0.00626975	0.0200964
SIPA1L2	NM_020808	0.62	0	0.00485095	0.479848
CDKN1C	NM_000076	0.63	0.33	0.00914733	0.0435368
FXYD6	NM_022003	0.63	0.5	0.0463833	0.0414883
SLC3A2	NM_001012661	0.63	0.21	0.00236577	0.0674487
EGFR	NM_005228	0.64	0.52	0.0302026	0.0478159
FAS	NM_152871	0.64	0	0.0190523	0.473183
VLDLR	NM_001018056	0.64	0.31	0.00482318	0.00656365
INSIG1	NM_005542,NM_198337	0.645	0.27	0.018664	0.0498419
C20orf46	NM_018354	0.65	0.58	0.0310582	0.00189851
CKB	NM_001823	0.65	0.51	0.0190222	0.0186981
LDLR	NM_000527	0.65	0.28	0.0134484	0.00866674
PRKAB2	NM_005399	0.65	0.13	0.0165995	0.129611
TMEFF1	NM_003692	0.65	0.47	0.0316698	0.0311149
BNIP3	NM_004052	0.66	0.44	0.00447571	0.00244783
IP6K2	NM_001005910	0.66	0.25	0.0177684	0.0505102
TCP11L2	NM_152772	0.66	0.25	0.00699352	0.134223
TTBK2	NM_173500	0.66	0.24	0.0386055	0.00274943
UGT1A8	NM_019076	0.67	0.38	0.0276636	0.0287629
ZMAT3	NM_022470	0.67	0.26	0.0307094	0.108241
UGT1A6	NM_205862,NM_001072	0.675	0.395	0.0222521	0.0278027
NFKBIA	NM_020529	0.68	0.16	0.00700149	0.0472496
RIMKLA	NM_173642	0.68	0.24	0.00243637	0.0548122
TAF5L	NM_001025247	0.68	0.21	0.0274404	0.102286
BTG3	NM_006806	0.69	0.09	0.0136191	0.118451
CBX4	NM_003655	0.69	0.38	0.005466	0.0173968
CLK3	NM_003992	0.7	0.46	0.0135873	0.0238295
PMAIP1	NM_021127	0.7	0.13	0.00870927	0.124511
TUBG2	NM_016437	0.7	0.53	0.0338166	0.0286184
PIM1	NM_002648	0.71	0.49	0.0248417	0.0689501
RORA	NM_002943	0.71	0.53	0.0438249	0.0242922
PPFIBP1	NM_177444	0.72	0.32	0.0136362	0.057592
UGT1A10	NM_019075	0.72	0.43	0.0246766	0.0318338
UGT1A9	NM_021027	0.72	0.43	0.0246766	0.0318338
DDB2	NM_000107	0.74	0.05	0.0143193	0.175835
GIT2	NM_139201	0.74	0.38	0.00590557	0.0229522
IL1RAP	NM_134470	0.74	0.11	0.0152713	0.21627
DUSP8	NM_004420	0.75	0.36	0.000410586	0.0348652
FTH1	NM_002032	0.75	0.49	0.0109169	0.0211274
ACTB	NM_001101	0.76	0.2	0.0474823	0.173222
RASSF1	NM_007182	0.76	0.16	0.012052	0.0757318
RRAS	NM_006270	0.76	0.5	0.0334034	0.0461084
C20orf111	NM_016470	0.77	0.27	0.0128717	0.0263598
HIST1H1C	NM_005319	0.78	0.33	0.00273214	0.0127059
MKNK2	NM_199054,NM_017572	0.78	0.405	0.011084	0.010822
DUSP5	NM_004419	0.79	0.33	0.0436576	0.015268
EYA3	NM_001990	0.79	0.05	0.00827774	0.384155
BAI2	NM_001703	0.8	0.66	0.00102458	0.00940701
CLK1	NM_004071	0.8	0.16	0.0031256	0.0747073
PDLIM5	NM_001011515	0.8	0.11	0.000891955	0.0323024
IER5	NM_016545	0.81	0.09	0.0075947	0.145644
ENO2	NM_001975	0.82	0.4	0.0108515	0.0134676
H1F0	NM_005318	0.82	0.52	0.000680992	0.000995336
CEP152	NM_014985	0.83	0.11	0.00266484	0.14389
CCL20	NM_004591	0.84	0.01	0.0194236	0.439145
YPEL2	NM_001005404	0.84	0.17	0.010156	0.0296387
ANKHD1	NM_017978	0.85	0.21	0.00983164	0.0883716
MAP3K14	NM_003954	0.85	0.18	0.0249655	0.131166
ALDOC	NM_005165	0.86	0.53	0.00870276	0.0314147
KLHL28	NM_017658	0.86	0.36	0.00373281	0.0428906
ABHD2	NM_007011	0.88	0.16	0.00295286	0.0129641
IRF6	NM_006147	0.88	0.46	0.0123392	0.00127202
KDM3A	NM_018433	0.88	0.34	0.00142919	0.00809089
PLOD2	NM_000935	0.89	0.96	0.0246049	0.00404275
HIST2H2BE	NM_003528	0.9	0.38	0.000992751	0.00998319
GADD45A	NM_001924	0.91	0.1	0.00780965	0.1445
FUT11	NM_173540	0.94	0.44	0.0200573	0.0591335
JUND	NM_005354	0.96	0.41	0.00969162	0.0381561
ELF3	NM_004433	0.97	0.41	0.0220464	0.0298679
HSPB1	NM_001540	0.97	0.77	0.0021921	0.000589992
ALDOA	NM_000034	0.98	0.71	0.017765	0.0213244
TNIK	NM_015028	0.98	0.39	0.0137723	0.0498386
GBP2	NM_004120	1	0.25	0.00338009	0.0827044
SAT1	NM_002970	1	0.19	0.00888163	0.0237986
ERO1L	NM_014584	1.02	0.25	0.0120385	0.0418071
RASD1	NM_016084	1.03	0.13	0.0020943	0.0912428
IRF1	NM_002198	1.04	0.01	0.0077602	0.453966
PFKFB4	NM_004567	1.04	0.7	0.00217402	0.00605316
JUNB	NM_002229	1.05	0.28	0.00457769	0.0759475
PER1	NM_002616	1.11	0.32	0.00120544	0.011312
BIRC3	NM_001165	1.12	0.11	0.00347481	0.155508
GPI	NM_000175	1.13	0.8	0.000695737	0.00043985
GADD45B	NM_015675	1.23	0.31	0.00858842	0.0704088
DDIT3	NM_004083	1.24	0.36	0.00305115	0.0357887
MAFF	NM_012323	1.25	0.55	0.0121215	0.0206708
KLF6	NM_001300	1.26	0.24	0.0291402	0.153676
DDIT4	NM_019058	1.29	0.65	0.000830224	0.00111912
PFKFB3	NM_004566	1.31	0.58	0.00256798	0.00724332
ZNF177	NM_003451	1.33	0.4	0.014575	0.0669117
JUN	NM_002228	1.41	0.25	0.00262336	0.0107099
HIST1H2BD	NM_021063,NM_138720	1.45	0.475	0.013242	0.038987
P4HA1	NM_000917	1.48	0.85	0.0098056	0.0374814
NDRG1	NM_006096	1.5	1.04	0.011286	0.00551178
TUFT1	NM_020127	1.52	0.04	0.0055845	0.211924
VEGFA	NM_003376	1.68	0.49	0.00149036	0.0113024
CDKN1A	NM_000389	1.69	0.57	0.019009	0.0590487
DUSP1	NM_004417	1.73	0.19	0.0294247	0.122467
ATF3	NM_001674	1.85	0.02	0.0109187	0.367235
SCNN1G	NM_001039	2.21	1.7	0.0405205	0.05572
C7orf68	NM_013332	2.25	0.68	0.000318323	0.0019908
GDF15	NM_004864	2.27	1.05	0.00767732	0.0192154
BHLHE40	NM_003670	2.43	1.14	0.00112319	0.002756
CXCR4	NM_001008540	2.69	0.89	0.0027145	0.0357817
ANKRD37	NM_181726	2.94	1.06	0.000640711	0.0148222
FOS	NM_005252	3.43	0.68	0.00150558	0.0323605
