# Supplementary material for: PLZF, a Tumor Suppressor Genetically Lost in Metastatic Castration-Resistant Prostate Cancer, Is a Mediator of Resistance to Androgen Deprivation Therapy
Source: Oxford University Press journal article supplement (doi:10.1158/0008-5472.can-14-3602), 2015-03-26
Supplement: 00085472can143602-sup-142165_1_supp_2829445_nzhpz7.xls [file 00085472can143602-sup-142165_1_supp_2829445_nzhpz7.xls]

## Sheet: PLZFshRNA1_fc1.5_P.05_withBindi
Symbol	probeset_id	PLZF shRNA.1_avg - ctrl_shRNA_avg	PLZF shRNA.2_avg - ctrl_shRNA_avg	(PLZF shRNA.1 vs Ctrl)_P-value	(PLZF shRNA.2 vs Ctr)_P-value
GDF15	NM_004864	2.27	1.05	0.00767732	0.0192154
ATF3	NM_001674	1.85	0.02	0.0109187	0.367235
JUN	NM_002228	1.41	0.25	0.00262336	0.0107099
DDIT4	NM_019058	1.29	0.65	0.000830224	0.00111912
DDIT3	NM_004083	1.24	0.36	0.00305115	0.0357887
JUNB	NM_002229	1.05	0.28	0.00457769	0.0759475
ELF3	NM_004433	0.97	0.41	0.0220464	0.0298679
JUND	NM_005354	0.96	0.41	0.00969162	0.0381561
FUT11	NM_173540	0.94	0.44	0.0200573	0.0591335
MKNK2	NM_199054	0.89	0.5	0.00155463	0.00146209
SUV420H1	NM_016028	0.89	0.34	0.0261554	0.0699486
ABHD2	NM_007011	0.88	0.16	0.00295286	0.0129641
ACTB	NM_001101	0.76	0.2	0.0474823	0.173222
RRAS	NM_006270	0.76	0.5	0.0334034	0.0461084
RASSF1	NM_007182	0.76	0.16	0.012052	0.0757318
FTH1	NM_002032	0.75	0.49	0.0109169	0.0211274
UGT1A4	NM_007120	0.72	0.43	0.0246766	0.0318338
UGT1A6	NM_205862	0.72	0.43	0.0246766	0.0318338
RORA	NM_134261	0.71	0.53	0.0438249	0.0242922
CLK3	NM_003992	0.7	0.46	0.0135873	0.0238295
CBX4	NM_003655	0.69	0.38	0.005466	0.0173968
NFKBIA	NM_020529	0.68	0.16	0.00700149	0.0472496
MKNK2	NM_017572	0.67	0.31	0.0206134	0.0201818
UGT1A6	NM_001072	0.63	0.36	0.0198276	0.0237715
SLC3A2	NM_001012661	0.63	0.21	0.00236577	0.0674487
ZFP36	NM_003407	0.58	-0.01	0.0131059	0.461709
POGLUT1	NM_152305	-0.58	-0.25	0.010186	0.0535039
ZNF84	NM_003428	-0.58	-0.32	0.00222627	0.0113794
GABRB3	NM_000814	-0.58	-0.2	0.00631172	0.0654692
SLC40A1	NM_014585	-0.59	-0.15	0.00255697	0.0638088
GULP1	NM_016315	-0.61	-0.24	0.0148364	0.0805878
NUFIP1	NM_012345	-0.63	-0.08	0.0472247	0.291638
ZNF302	NM_001012320	-0.63	-0.39	0.0339721	0.0386683
LCMT2	NM_014793	-0.64	-0.23	0.0231692	0.0840124
POLR3B	NM_018082	-0.66	-0.3	0.0413699	0.065576
EPHX4	NM_173567	-0.67	0.06	0.0340155	0.332524
IQCG	NM_032263	-0.68	-0.13	0.0381094	0.264915
KIAA0586	NM_014749	-0.69	-0.2	0.0174006	0.114596
C14orf142	NM_032490	-0.7	-0.35	0.0321697	0.0433259
MYC	NM_002467	-0.7	-0.05	0.0140357	0.0750649
NMNAT1	NM_022787	-0.71	-0.26	0.0170709	0.0437661
WTAP	NM_152857	-0.73	-0.64	0.0130292	0.00660376
FUS	NM_004960	-0.74	-0.29	0.00339502	0.0296575
NOP56	NM_006392	-0.74	-0.3	0.00649426	0.0519907
PPHLN1	NM_016488	-0.74	-0.23	0.0294325	0.0746673
TUBGCP3	NM_006322	-0.76	-0.4	0.0102588	0.0110597
ST7	NM_018412	-0.77	0.08	0.0160084	0.260114
SUV420H1	NM_017635	-0.78	-0.31	0.0309995	0.092142
ADAMTS1	NM_006988	-0.79	-0.79	0.024609	0.0221713
SACS	NM_014363	-0.84	-0.36	0.0317082	0.00625658
RAD51L1	NM_002877	-0.87	-0.06	0.0196787	0.269152
C7orf36	NM_020192	-0.89	-0.24	0.00415373	0.0400823
PHOSPHO2	NM_001008489	-0.93	-0.3	0.0150647	0.0808705
PPP1R10	NM_002714	-0.95	-0.14	0.000608636	0.0326477
PIK3R1	NM_181504	-0.99	-0.38	0.000267439	0.00591663
PIGW	NM_178517	-1	-0.58	0.0329523	0.0568801
ZNF789	NM_213603	-1.11	-0.42	0.0334572	0.0789641
